# Supplementary material for: Evaluating a novel Integrated Community of Care (ICoC) for patients from an urbanised low-income community in Singapore using the participatory action research (PAR) methodology: a study protocol
Source: PubMed Central journal article supplement — BMJ Open. 2017 Oct 8;7(10):e017839. doi: 10.1136/bmjopen-2017-017839 (PMC5640049; doi:10.1136/bmjopen-2017-017839), 2017-10-08
Supplement: bmjopen-2017-017839supp001.pdf [file bmjopen-2017-017839supp001.pdf]

## Appendix A: Predictors of 30-day readmission risk for propensity score matching

---

| <b>Domains</b>              | <b>Predictor</b>                                                                                                                                               |
|-----------------------------|----------------------------------------------------------------------------------------------------------------------------------------------------------------|
| Patient demographics        | Age<br>Gender<br>Required financial assistance using Medifund                                                                                                  |
| Past healthcare utilization | Emergency department visits six months before index admission<br>Hospital admissions one year before index admission                                           |
| Index admission             | Urgent / Emergency admission<br>Stayed in a subsidized ward<br>Required inpatient dialysis<br>Required intravenous furosemide 40mg and above<br>Length of stay |
| Medical comorbidities       | Depression<br>History of alcoholism<br>Osteoarthritis<br>Spine fracture<br>Charlson comorbidity index                                                          |
|                             | Total 15 predictors                                                                                                                                            |

---
